# Supplementary material
Source: Research Square preprint supplement (doi:10.21203/rs.3.rs-9436095/v1)
Supplement: Supplementary file 1 [file e65134034c12362cf151a16c.docx]

STROBE checklist for cross-sectional studies

*Manuscript: Patient experiences of tissue donation and digital consent support in primary craniospinal tumour research*

| **Item** | **Section** | **Recommendation** | **Page no(s)** | **Location in manuscript** |
| --- | --- | --- | --- | --- |
| 1 | Title and abstract | (a) Indicate the study design with a commonly used term in the title or abstract. (b) Provide an informative and balanced summary in the abstract. | 1 | Addressed in title and structured abstract. |
| 2 | Background/rationale | Explain the scientific background and rationale for the investigation. | 2 | Introduction paragraphs 1–3. |
| 3 | Objectives | State specific objectives, including any prespecified hypotheses. | 2 | Final Introduction paragraph. |
| 4 | Study design | Present key elements of study design early in the paper. | 3 | Methods: Design and reporting. |
| 5 | Setting | Describe the setting, locations, and relevant dates, including recruitment and data collection. | 3 | Methods: Participants and recruitment. |
| 6 | Participants | Give the eligibility criteria and sources and methods of selection of participants. | 3–4 | Methods: Participants and recruitment; Table 1. |
| 7 | Variables | Clearly define outcomes, exposures, predictors, potential confounders, and effect modifiers. | 3 | Methods: Survey content. |
| 8 | Data sources/measurement | For each variable of interest, give sources of data and details of methods of assessment. | 3 | Methods: Survey content. |
| 9 | Bias | Describe any efforts to address potential sources of bias. | 3, 6 | Recruitment and design described in Methods; additional discussion in Limitations. |
| 10 | Study size | Explain how the study size was arrived at. | 3 | Methods: Participants and recruitment (pragmatic exploratory sample). |
| 11 | Quantitative variables | Explain how quantitative variables were handled in the analyses. | 3 | Methods: Data analysis. |
| 12 | Statistical methods | (a) Describe all statistical methods. (b) Describe methods for subgroup analyses/interactions. (c) Explain how missing data were addressed. (d) If applicable, describe analytical methods taking account of sampling strategy. | 3–6 | Descriptive statistics described in Methods; item-level denominators reported in Results; no subgroup analyses undertaken. |
| 13 | Participants | (a) Report numbers of individuals at each stage. (b) Give reasons for non-participation. (c) Consider use of a flow diagram. | 4 | Results opening paragraph; total completing sample reported. Flow diagram not used. |
| 14 | Descriptive data | (a) Give characteristics of study participants. (b) Indicate number with missing data for each variable. | 4–5 | Table 2 and item-level denominators in Table 3. |
| 15 | Outcome data | Report numbers of outcome events or summary measures. | 4–5 | Results section and Table 3. |
| 16 | Main results | (a) Give unadjusted estimates and, if applicable, confounder-adjusted estimates. (b) Report category boundaries when continuous variables were categorised. (c) If relevant, consider translating estimates into absolute risk. | 4–5 | Descriptive unadjusted percentages reported; no adjusted analyses applicable. |
| 17 | Other analyses | Report other analyses done, such as subgroup and sensitivity analyses. | 6 | No subgroup or sensitivity analyses were undertaken; this is stated in Methods and Limitations. |
| 18 | Key results | Summarise key results with reference to study objectives. | 6–7 | Discussion opening paragraphs. |
| 19 | Limitations | Discuss limitations of the study, taking into account sources of potential bias or imprecision. | 6–7 | Discussion paragraph beginning "The manuscript has several limitations". |
| 20 | Interpretation | Give a cautious overall interpretation considering objectives, limitations, multiplicity of analyses, and evidence from similar studies. | 6–7 | Discussion paragraphs 2–6. |
| 21 | Generalisability | Discuss the generalisability of the study results. | 6–7 | Discussion limitation and concluding interpretation paragraphs. |
| 22 | Funding | Give the source of funding and the role of the funders. | 14 | Funding source documented on page 14. |
